# Supplementary material for: Oxidative Release of O-Glycans under Neutral Conditions for Analysis of Glycoconjugates Having Base-Sensitive Substituents
Source: PubMed Central journal article supplement (PMC10267892; doi:10.1021/acs.analchem.3c00127), 2023-06-01
Supplement: ac3c00127_si_001.pdf [file ac3c00127_si_001.pdf]

## Supporting Information

### Oxidative release of *O*-glycans under neutral conditions for analysis of glycoconjugates having base sensitive substituents

Gael M. Vos<sup>1</sup>, Julia Weber<sup>1</sup>, Igor R. Sweet<sup>1</sup>, Kevin C. Hooijschuur<sup>1</sup>, Javier Sastre Torano<sup>1</sup>, Geert-Jan Boons<sup>1,2</sup>

<sup>1</sup>Department of Chemical Biology and Drug Discovery, Utrecht Institute for Pharmaceutical Sciences, Utrecht University, Universiteitsweg 99, 3584 CG Utrecht, the Netherlands

<sup>2</sup>Complex Carbohydrate Research Center and Department of Chemistry, University of Georgia, 315 Riverbend Road, Athens, GA 30602, United States

#### Table of Content

- Page S2-S20**    **Table I.** Extracted LC-MS chromatograms of glycopeptide standards **1-4** and compounds released from the glycopeptide with hypochlorite.
- Page S21-S31**    **Table II.** Compositions of *O*-glycans released from BSM with neutralized hypochlorite and analyzed with LC-MS with an eluent pH of 6.5.
- Page S32-S34**    **Table III.** Compositions of *O*-glycans released from BSM with reductive beta elimination and analyzed with LC-MS with an eluent pH of 6.5.
- Page S35-S36**    **Table IV:** Compositions of *O*-glycans released from BSM with reductive beta elimination and analyzed with LC-MS with an eluent pH of 7.8.

**Table I:** Extracted LC-MS chromatograms of glycopeptide standards **1-4** and compounds released from the glycopeptide with hypochlorite. The lactic acid-linked glycoside is annotated as “released”.

Chromatograms of peptide reaction mixtures at different time points and pH values during oxidative release.

| Glycopeptide                                                                              | pH of hypochlorite solution | Reaction time (min) | Extracted ion chromatogram                                                           |
|-------------------------------------------------------------------------------------------|-----------------------------|---------------------|--------------------------------------------------------------------------------------|
| 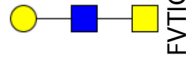 FVTIG   | 5.0                         | 0 min               |    |
|  FVTIG   | 5.0                         | 10 min              |    |
|  FVTIG   | 5.0                         | 20 min              |   |
|  FVTIG | 5.0                         | 30 min              |  |
|  FVTIG | 5.0                         | 40 min              |  |

Chromatograms of peptide reaction mixtures at different time points and pH values during oxidative release.

| Glycopeptide                                                                                     | pH of hypochlorite solution | Reaction time (min) | Extracted ion chromatogram                                                           |
|--------------------------------------------------------------------------------------------------|-----------------------------|---------------------|--------------------------------------------------------------------------------------|
| 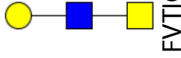 <p>FVTIG</p>   | 5.0                         | 50 min              |    |
|  <p>FVTIG</p>   | 5.0                         | 60 min              |    |
|  <p>FVTIG</p>   | 6.0                         | 0 min               |   |
|  <p>FVTIG</p> | 6.0                         | 10 min              |  |
|  <p>FVTIG</p> | 6.0                         | 20 min              |  |
|  <p>FVTIG</p> | 6.0                         | 30 min              |  |

Chromatograms of peptide reaction mixtures at different time points and pH values during oxidative release.

| Glycopeptide | pH of hypochlorite solution | Reaction time (min) | Extracted ion chromatogram |
|--------------|-----------------------------|---------------------|----------------------------|
| FVTIG        | 6.0                         | 40 min              |                            |
| FVTIG        | 6.0                         | 50 min              |                            |
| FVTIG        | 6.0                         | 60 min              |                            |
| FVTIG        | 6.25                        | 0 min               |                            |
| FVTIG        | 6.25                        | 10 min              |                            |
| FVTIG        | 6.25                        | 20 min              |                            |

Chromatograms of peptide reaction mixtures at different time points and pH values during oxidative release.

| Glycopeptide                                                                              | pH of hypochlorite solution | Reaction time (min) | Extracted ion chromatogram                                                           |
|-------------------------------------------------------------------------------------------|-----------------------------|---------------------|--------------------------------------------------------------------------------------|
| 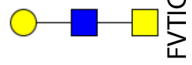 FVTIG   | 6.25                        | 30min               |    |
|  FVTIG   | 6.25                        | 40 min              |    |
|  FVTIG   | 6.25                        | 50 min              |   |
|  FVTIG | 6.5                         | 0 min               |  |
|  FVTIG | 6.5                         | 10 min              |  |
|  FVTIG | 6.5                         | 20 min              |  |

Chromatograms of peptide reaction mixtures at different time points and pH values during oxidative release.

| Glycopeptide                                                                              | pH of hypochlorite solution | Reaction time (min) | Extracted ion chromatogram                                                           |
|-------------------------------------------------------------------------------------------|-----------------------------|---------------------|--------------------------------------------------------------------------------------|
| 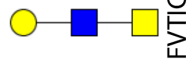 FVTIG   | 6.5                         | 30min               |    |
|  FVTIG   | 6.5                         | 40 min              |    |
|  FVTIG   | 6.5                         | 50 min              |   |
|  FVTIG | 6.75                        | 0 min               |  |
|  FVTIG | 6.75                        | 10 min              |  |
|  FVTIG | 6.75                        | 20 min              |  |

Chromatograms of peptide reaction mixtures at different time points and pH values during oxidative release.

| Glycopeptide                                                                              | pH of hypochlorite solution | Reaction time (min) | Extracted ion chromatogram                                                           |
|-------------------------------------------------------------------------------------------|-----------------------------|---------------------|--------------------------------------------------------------------------------------|
| 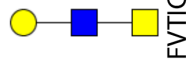 FVTIG   | 6.75                        | 30min               |    |
|  FVTIG   | 6.75                        | 40 min              |    |
|  FVTIG   | 6.75                        | 50 min              |   |
|  FVTIG | 6.75                        | 60 min              |  |
|  FVTIG | 7.0                         | 0 min               |  |
|  FVTIG | 7.0                         | 10 min              |  |

Chromatograms of peptide reaction mixtures at different time points and pH values during oxidative release.

| Glycopeptide                                                                              | pH of hypochlorite solution | Reaction time (min) | Extracted ion chromatogram                                                           |
|-------------------------------------------------------------------------------------------|-----------------------------|---------------------|--------------------------------------------------------------------------------------|
| 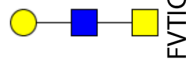 FVTIG   | 7.0                         | 30min               |    |
|  FVTIG   | 7.0                         | 40 min              |    |
|  FVTIG   | 7.0                         | 50 min              |   |
|  FVTIG | 7.0                         | 60 min              |  |
|  FVTIG | 7.5                         | 0 min               |  |
|  FVTIG | 7.5                         | 10 min              |  |



Chromatograms of peptide reaction mixtures at different time points and pH values during oxidative release.

| Glycopeptide                                                                              | pH of hypochlorite solution | Reaction time (min) | Extracted ion chromatogram                                                           |
|-------------------------------------------------------------------------------------------|-----------------------------|---------------------|--------------------------------------------------------------------------------------|
| 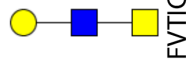 FVTIG   | 7.5                         | 20 min              |    |
|  FVTIG   | 7.5                         | 30 min              |    |
|  FVTIG   | 7.5                         | 40 min              |   |
|  FVTIG | 7.5                         | 50 min              |  |
|  FVTIG | 7.5                         | 60 min              |  |

Chromatograms of peptide reaction mixtures at different time points and pH values during oxidative release.

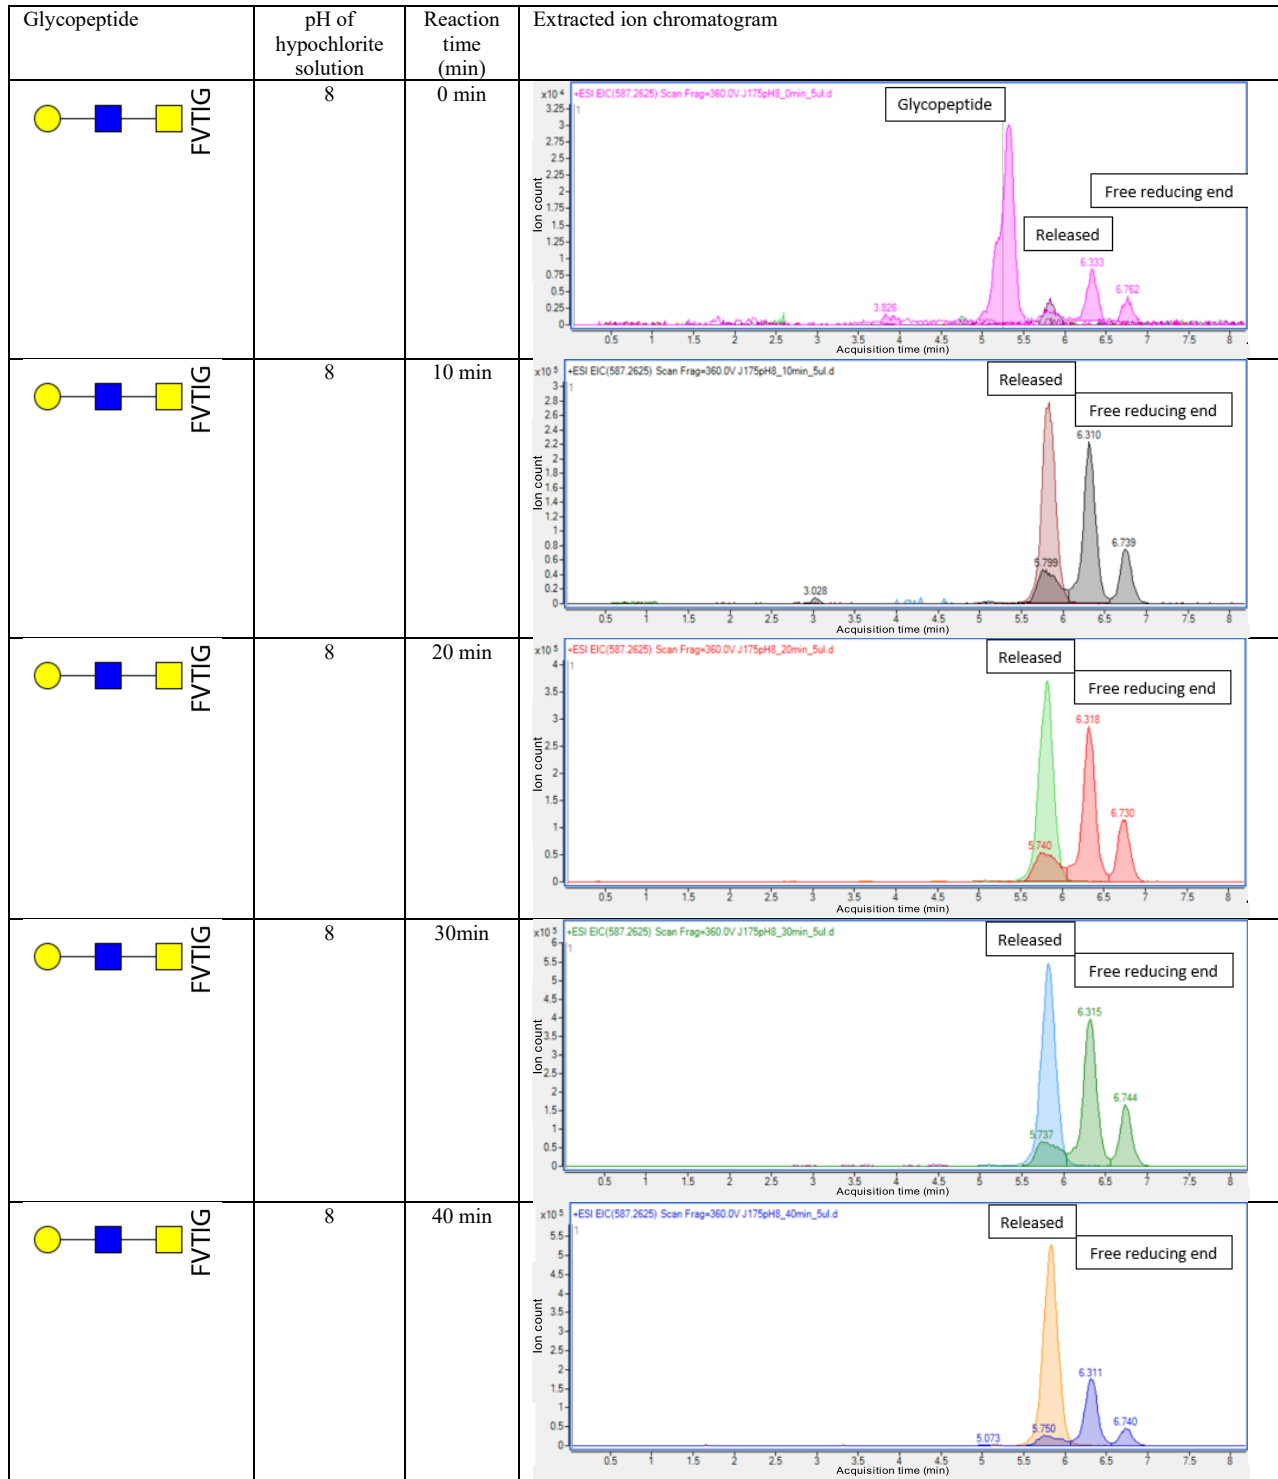

Chromatograms of peptide reaction mixtures at different time points and pH values during oxidative release.

| Glycopeptide                                                                                     | pH of hypochlorite solution | Reaction time (min) | Extracted ion chromatogram                                                           |
|--------------------------------------------------------------------------------------------------|-----------------------------|---------------------|--------------------------------------------------------------------------------------|
| 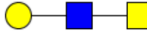 <p>FVTIG</p>   | 8                           | 50 min              |    |
|  <p>FVTIG</p>   | 8                           | 60 min              |    |
|  <p>FVTIG</p>   | 9                           | 0 min               |   |
|  <p>FVTIG</p> | 9                           | 10 min              |  |
|  <p>FVTIG</p> | 9                           | 20 min              |  |

Chromatograms of peptide reaction mixtures at different time points and pH values during oxidative release.

| Glycopeptide                                                                              | pH of hypochlorite solution | Reaction time (min) | Extracted ion chromatogram                                                           |
|-------------------------------------------------------------------------------------------|-----------------------------|---------------------|--------------------------------------------------------------------------------------|
| 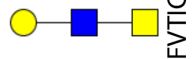 FVTIG   | 9                           | 30min               |    |
|  FVTIG   | 9                           | 40 min              |    |
|  FVTIG   | 9                           | 50 min              |   |
|  FVTIG | 9                           | 60 min              |  |
|  FVTIG | 10                          | 0 min               |  |

Chromatograms of peptide reaction mixtures at different time points and pH values during oxidative release.

| Glycopeptide                                                                              | pH of hypochlorite solution | Reaction time (min) | Extracted ion chromatogram                                                           |
|-------------------------------------------------------------------------------------------|-----------------------------|---------------------|--------------------------------------------------------------------------------------|
| 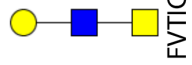 FVTIG   | 10                          | 10 min              |    |
|  FVTIG   | 10                          | 20 min              |    |
|  FVTIG   | 10                          | 30 min              |   |
|  FVTIG | 10                          | 40 min              |  |
|  FVTIG | 10                          | 50 min              |  |

Chromatograms of peptide reaction mixtures at different time points and pH values during oxidative release.

| Glycopeptide                                                                              | pH of hypochlorite solution | Reaction time (min) | Extracted ion chromatogram                                                           |
|-------------------------------------------------------------------------------------------|-----------------------------|---------------------|--------------------------------------------------------------------------------------|
| 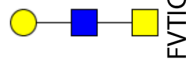 FVTIG   | 10                          | 60 min              |    |
|  FVTIG   | 11                          | 0 min               |    |
|  FVTIG   | 11                          | 10 min              |   |
|  FVTIG | 11                          | 20 min              |  |
|  FVTIG | 11                          | 30 min              |  |
|  FVTIG | 11                          | 40 min              |  |

Chromatograms of peptide reaction mixtures at different time points and pH values during oxidative release.

| Glycopeptide                                                                              | pH of hypochlorite solution | Reaction time (min) | Extracted ion chromatogram                                                           |
|-------------------------------------------------------------------------------------------|-----------------------------|---------------------|--------------------------------------------------------------------------------------|
| 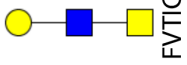 FVTIG   | 11                          | 50 min              |    |
|  FVTIG   | 11                          | 60 min              |    |
|  FVTIG   | 12                          | 0 min               |   |
|  FVTIG | 12                          | 10 min              |  |
|  FVTIG | 12                          | 20 min              |  |

Chromatograms of peptide reaction mixtures at different time points and pH values during oxidative release.

| Glycopeptide                                                                              | pH of hypochlorite solution | Reaction time (min) | Extracted ion chromatogram                                                           |
|-------------------------------------------------------------------------------------------|-----------------------------|---------------------|--------------------------------------------------------------------------------------|
| 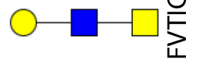 FVTIG   | 12                          | 30min               |    |
|  FVTIG   | 12                          | 40 min              |    |
|  FVTIG   | 12                          | 50 min              |   |
|  FVTIG | 12                          | 60 min              |  |
|  FVTIG | 6.75                        | 0 min               |  |
|  FVTIG | 6.75                        | 10 min              |  |



Chromatograms of peptide reaction mixtures at different time points and pH values during oxidative release.

| Glycopeptide                                                                              | pH of hypochlorite solution | Reaction time (min) | Extracted ion chromatogram                                                           |
|-------------------------------------------------------------------------------------------|-----------------------------|---------------------|--------------------------------------------------------------------------------------|
| 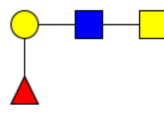 FVTIG   | 6.75                        | 20 min              |    |
|  FVTIG   | 6.75                        | 30 min              |    |
|  FVTIG   | 6.75                        | 40 min              |    |
|  FVTIG  | 6.75                        | 50 min              |   |
|  FVTIG | 6.75                        | 60 min              |  |
|  FVTIG | 6.75                        | 70 min              |  |
|  FVTIG | 6.75                        | 80 min              |  |
|  FVTIG | 6.75                        | 90 min              |  |

Chromatograms of peptide reaction mixtures at different time points and pH values during oxidative release.

| Glycopeptide                                                                              | pH of hypochlorite solution | Reaction time (min) | Extracted ion chromatogram                                                           |
|-------------------------------------------------------------------------------------------|-----------------------------|---------------------|--------------------------------------------------------------------------------------|
| 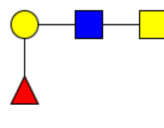 FVTIG   | 6.75                        | 100 min             |    |
|  FVTIG   | 6.75                        | 0 min               |    |
|  FVTIG   | 6.75                        | 10 min              |    |
|  FVTIG   | 6.75                        | 20 min              |   |
|  FVTIG | 6.75                        | 30 min              |  |
|  FVTIG | 6.75                        | 40 min              |  |
|  FVTIG | 6.75                        | 50 min              |  |
|  FVTIG | 6.75                        | 60 min              |  |

Chromatograms of peptide reaction mixtures at different time points and pH values during oxidative release.

| Glycopeptide                                                                              | pH of hypochlorite solution | Reaction time (min) | Extracted ion chromatogram                                                           |
|-------------------------------------------------------------------------------------------|-----------------------------|---------------------|--------------------------------------------------------------------------------------|
| 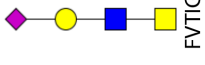 FVTIG   | 6.75                        | 70 min              |    |
|  FVTIG   | 6.75                        | 80 min              |    |
|  FVTIG   | 6.75                        | 90 min              |    |
|  FVTIG   | 6.75                        | 0 min               |   |
|  FVTIG | 6.75                        | 10 min              |  |
|  FVTIG | 6.75                        | 20 min              |  |
|  FVTIG | 6.75                        | 30 min              |  |

Chromatograms of peptide reaction mixtures at different time points and pH values during oxidative release.

| Glycopeptide                                                                                     | pH of hypochlorite solution | Reaction time (min) | Extracted ion chromatogram                                                           |
|--------------------------------------------------------------------------------------------------|-----------------------------|---------------------|--------------------------------------------------------------------------------------|
| 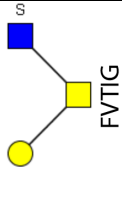 <p>FVTIG</p>   | 6.75                        | 40 min              |    |
|  <p>FVTIG</p>   | 6.75                        | 50 min              |    |
|  <p>FVTIG</p>  | 6.75                        | 60 min              |   |
|  <p>FVTIG</p> | 6.75                        | 80 min              | No glycan/glycopeptide observed                                                      |
|  <p>FVTIG</p> | 6.75                        | 100 min             |  |
|  <p>FVTIG</p> | 6.75                        | 120 min             |  |

**Table II:** Compositions of *O*-glycans released from BSM with neutralized hypochlorite and analyzed with LC-MS with an eluent pH of 6.5. AA=amino acid (T=threonine, S=serine), Hex=hexose, Fuc=fucose, Neu5Ac= *N*-Acetylneuraminic acid, Neu5Gc= *N*-Glycolylneuraminic acid, OAc=O-acetylated, HexA=hexosamine, Sulf=sulfated.

*O*-glycan structures identified in BSM after oxidative release and analysis at pH 6.5.

| Suggested structure | Observed $m/z$ [M-H] <sup>-</sup> | Calculated $m/z$ [M-H] <sup>-</sup> | Relative abundance (%) | AA | Hex | HexNAc | Fuc | Neu5Ac | Neu5Gc | OAc | HexA | Sulf |
|---------------------|-----------------------------------|-------------------------------------|------------------------|----|-----|--------|-----|--------|--------|-----|------|------|
|                     | 625.2105                          | 625.2092                            | 15.1                   | T  | 0   | 1      | 0   | 1      | 0      | 1   | 0    | 0    |
|                     | 667.2211                          | 667.2198                            | 10.5                   | T  | 0   | 1      | 0   | 1      | 0      | 2   | 0    | 0    |
|                     | 611.1948                          | 611.1936                            | 7.50                   | S  | 0   | 1      | 0   | 1      | 0      | 1   | 0    | 0    |
|                     | 653.2053                          | 653.2042                            | 5.98                   | S  | 0   | 1      | 0   | 1      | 0      | 2   | 0    | 0    |
|                     | 641.2055                          | 641.2041                            | 5.46                   | T  | 0   | 1      | 0   | 0      | 1      | 1   | 0    | 0    |
|                     | 870.3014                          | 870.2992                            | 4.34                   | T  | 0   | 2      | 0   | 1      | 0      | 2   | 0    | 0    |
|                     | 709.231                           | 709.2304                            | 4.09                   | T  | 0   | 1      | 0   | 1      | 0      | 3   | 0    | 0    |
|                     | 856.2857                          | 856.2836                            | 3.95                   | S  | 0   | 2      | 0   | 1      | 0      | 2   | 0    | 0    |
|                     | 583.1997                          | 583.1986                            | 3.68                   | T  | 0   | 1      | 0   | 1      | 0      | 0   | 0    | 0    |
|                     | 599.1947                          | 599.1935                            | 3.08                   | T  | 0   | 1      | 0   | 0      | 1      | 0   | 0    | 0    |
|                     | 1251.4298                         | 1251.4263                           | 2.67                   | T  | 1   | 3      | 0   | 0      | 1      | 2   | 0    | 0    |
|                     | 569.1838                          | 569.1830                            | 2.47                   | S  | 0   | 1      | 0   | 1      | 0      | 0   | 0    | 0    |
|                     | 695.2161                          | 695.2148                            | 2.32                   | S  | 0   | 1      | 0   | 1      | 0      | 3   | 0    | 0    |
|                     | 814.2747                          | 814.2730                            | 1.95                   | S  | 0   | 2      | 0   | 1      | 0      | 1   | 0    | 0    |
|                     | 725.2264                          | 725.2253                            | 1.84                   | T  | 0   | 1      | 0   | 0      | 1      | 3   | 0    | 0    |
|                     | 828.2906                          | 828.2886                            | 1.59                   | T  | 0   | 2      | 0   | 1      | 0      | 1   | 0    | 0    |
|                     | 683.2161                          | 683.2147                            | 1.52                   | T  | 0   | 1      | 0   | 0      | 1      | 2   | 0    | 0    |

O-glycan structures identified in BSM after oxidative release and analysis at pH 6.5.

| Suggested structure                                                                 | Observed $m/z$ [M-H] <sup>-</sup> | Calculated $m/z$ [M-H] <sup>-</sup> | Relative abundance (%) | AA | Hex | HexNAc | Fuc | Neu5Ac | Neu5Ge | OAc | HexA | Sulf |
|-------------------------------------------------------------------------------------|-----------------------------------|-------------------------------------|------------------------|----|-----|--------|-----|--------|--------|-----|------|------|
|    | 585.1788                          | 585.1779                            | 1.39                   | S  | 0   | 1      | 0   | 0      | 1      | 0   | 0    | 0    |
|    | 786.2796                          | 786.2780                            | 1.26                   | T  | 0   | 2      | 0   | 1      | 0      | 0   | 0    | 0    |
|    | 830.27                            | 830.2679                            | 1.19                   | S  | 0   | 2      | 0   | 0      | 1      | 1   | 0    | 0    |
|    | 772.2643                          | 772.2624                            | 1.05                   | S  | 0   | 2      | 0   | 1      | 0      | 0   | 0    | 0    |
|    | 802.2748                          | 802.2729                            | 1.03                   | T  | 0   | 2      | 0   | 0      | 1      | 0   | 0    | 0    |
|    | 586.1991                          | 586.1983                            | 1.02                   | S  | 1   | 1      | 1   | 0      | 0      | 0   | 0    | 0    |
|    | 912.3121                          | 912.3098                            | 0.97                   | T  | 0   | 2      | 0   | 1      | 0      | 3   | 0    | 0    |
|    | 928.3072                          | 928.3047                            | 0.93                   | T  | 0   | 2      | 0   | 0      | 1      | 3   | 0    | 0    |
|   | 627.1902                          | 627.1885                            | 0.84                   | S  | 0   | 1      | 0   | 0      | 1      | 1   | 0    | 0    |
|  | 711.2111                          | 711.2097                            | 0.79                   | S  | 0   | 1      | 0   | 0      | 1      | 3   | 0    | 0    |
|  | 898.2968                          | 898.2942                            | 0.78                   | S  | 0   | 2      | 0   | 1      | 0      | 3   | 0    | 0    |
|  | 788.2593                          | 788.2573                            | 0.75                   | S  | 0   | 2      | 0   | 0      | 1      | 0   | 0    | 0    |
|  | 844.2858                          | 844.2835                            | 0.71                   | T  | 0   | 2      | 0   | 0      | 1      | 1   | 0    | 0    |
|  | 481.1677                          | 481.1670                            | 0.69                   | S  | 0   | 2      | 0   | 0      | 0      | 0   | 0    | 0    |
|  | 886.2968                          | 886.2941                            | 0.66                   | T  | 0   | 2      | 0   | 0      | 1      | 2   | 0    | 0    |
|  | 669.2008                          | 669.1991                            | 0.66                   | S  | 0   | 1      | 0   | 0      | 1      | 2   | 0    | 0    |
|  | 872.2809                          | 872.2785                            | 0.52                   | S  | 0   | 2      | 0   | 0      | 1      | 2   | 0    | 0    |
|  | 1097.3909                         | 1097.3884                           | 0.50                   | S  | 2   | 2      | 2   | 0      | 0      | 0   | 0    | 0    |

O-glycan structures identified in BSM after oxidative release and analysis at pH 6.5.

| Suggested structure                                                                 | Observed $m/z$ [M-H] <sup>-</sup> | Calculated $m/z$ [M-H] <sup>-</sup> | Relative abundance (%) | AA | Hex | HexNAc | Fuc | Neu5Ac | Neu5Ge | OAc | HexA | Sulf |
|-------------------------------------------------------------------------------------|-----------------------------------|-------------------------------------|------------------------|----|-----|--------|-----|--------|--------|-----|------|------|
| 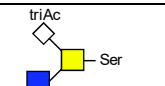   | 914.2915                          | 914.2891                            | 0.44                   | S  | 0   | 2      | 0   | 0      | 1      | 3   | 0    | 0    |
|    | 992.36                            | 992.3571                            | 0.37                   | S  | 1   | 3      | 1   | 0      | 0      | 0   | 0    | 0    |
|    | 684.2477                          | 684.2463                            | 0.33                   | S  | 0   | 3      | 0   | 0      | 0      | 0   | 0    | 0    |
|    | 643.2211                          | 643.2198                            | 0.28                   | S  | 1   | 2      | 0   | 0      | 0      | 0   | 0    | 0    |
|    | 1167.4091                         | 1167.4051                           | 0.27                   | T  | 1   | 3      | 0   | 0      | 1      | 0   | 0    | 0    |
|    | 495.1836                          | 495.1826                            | 0.22                   | T  | 0   | 2      | 0   | 0      | 0      | 0   | 0    | 0    |
|    | 1164.3977                         | 1164.3943                           | 0.17                   | S  | 1   | 2      | 1   | 1      | 0      | 2   | 0    | 0    |
|   | 805.2743                          | 805.2726                            | 0.15                   | S  | 2   | 2      | 0   | 0      | 0      | 0   | 0    | 0    |
|  | 789.2789                          | 789.2777                            | 0.15                   | S  | 1   | 2      | 1   | 0      | 0      | 0   | 0    | 0    |
|  | 951.3324                          | 951.3305                            | 0.15                   | S  | 2   | 2      | 1   | 0      | 0      | 0   | 0    | 0    |
|  | 975.3333                          | 975.3306                            | 0.14                   | T  | 1   | 1      | 1   | 1      | 0      | 2   | 0    | 0    |
|  | 846.3009                          | 846.2992                            | 0.13                   | S  | 1   | 3      | 0   | 0      | 0      | 0   | 0    | 0    |
|  | 1018.3384                         | 1018.3364                           | 0.13                   | S  | 1   | 2      | 0   | 1      | 0      | 2   | 0    | 0    |
|  | 723.1776                          | 723.1766                            | 0.12                   | S  | 1   | 2      | 0   | 0      | 0      | 0   | 0    | 1    |
|  | 1300.471                          | 1300.4678                           | 0.11                   | S  | 2   | 3      | 2   | 0      | 0      | 0   | 0    | 0    |
|  | 1195.4398                         | 1195.4364                           | 0.11                   | S  | 1   | 4      | 1   | 0      | 0      | 0   | 0    | 0    |
|  | 1178.4123                         | 1178.4100                           | 0.11                   | T  | 1   | 2      | 1   | 1      | 0      | 2   | 0    | 0    |

O-glycan structures identified in BSM after oxidative release and analysis at pH 6.5.

| Suggested structure | Observed $m/z$ [M-H] <sup>-</sup> | Calculated $m/z$ [M-H] <sup>-</sup> | Relative abundance (%) | AA | Hex | HexNAc | Fuc | Neu5Ac | Neu5Ge | OAc | HexA | Sulf |
|---------------------|-----------------------------------|-------------------------------------|------------------------|----|-----|--------|-----|--------|--------|-----|------|------|
|                     | 803.2954                          | 803.2933                            | 0.10                   | T  | 1   | 2      | 1   | 0      | 0      | 0   | 0    | 0    |
| diAc                | 1440.4927                         | 1440.4900                           | 0.10                   | S  | 1   | 4      | 0   | 0      | 1      | 2   | 0    | 0    |
| diAc                | 1237.4146                         | 1237.4107                           | 0.098                  | S  | 1   | 3      | 0   | 0      | 1      | 2   | 0    | 0    |
|                     | 698.2635                          | 698.2620                            | 0.084                  | T  | 0   | 3      | 0   | 0      | 0      | 0   | 0    | 0    |
| diAc                | 1454.5076                         | 1454.5057                           | 0.083                  | T  | 1   | 4      | 0   | 0      | 1      | 2   | 0    | 0    |
|                     | 761.2478                          | 761.2464                            | 0.082                  | T  | 1   | 1      | 0   | 0      | 1      | 0   | 0    | 0    |
|                     | 1006.3648                         | 1006.3727                           | 0.077                  | T  | 1   | 3      | 1   | 0      | 0      | 0   | 0    | 0    |
| diAc                | 961.3174                          | 961.3149                            | 0.077                  | S  | 1   | 1      | 1   | 1      | 0      | 2   | 0    | 0    |
| Ac                  | 787.2627                          | 787.2621                            | 0.076                  | T  | 1   | 1      | 0   | 1      | 0      | 1   | 0    | 0    |
| diAc                | 1032.353                          | 1032.3520                           | 0.073                  | T  | 1   | 2      | 0   | 1      | 0      | 2   | 0    | 0    |
|                     | 1031.2891                         | 1031.2873                           | 0.069                  | S  | 2   | 2      | 1   | 0      | 0      | 0   | 0    | 1    |
|                     | 745.2523                          | 745.2515                            | 0.066                  | T  | 1   | 1      | 0   | 1      | 0      | 0   | 0    | 0    |
| diAc                | 1034.3325                         | 1034.3313                           | 0.064                  | S  | 1   | 2      | 0   | 0      | 1      | 2   | 0    | 0    |
|                     | 710.1433                          | 710.1450                            | 0.064                  | T  | 1   | 1      | 0   | 0      | 0      | 0   | 1    | 1    |
|                     | 520.0981                          | 520.0972                            | 0.060                  | S  | 1   | 1      | 0   | 0      | 0      | 0   | 0    | 1    |
| Ac                  | 803.2581                          | 803.2570                            | 0.057                  | T  | 1   | 1      | 0   | 0      | 1      | 1   | 0    | 0    |
| Ac                  | 976.3271                          | 976.3258                            | 0.055                  | S  | 1   | 2      | 0   | 1      | 0      | 1   | 0    | 0    |



O-glycan structures identified in BSM after oxidative release and analysis at pH 6.5.

| Suggested structure | Observed $m/z$ [M-H] <sup>-</sup> | Calculated $m/z$ [M-H] <sup>-</sup> | Relative abundance (%) | AA | Hex | HexNAc | Fuc | Neu5Ac | Neu5Ge | OAc | HexA | Sulf |
|---------------------|-----------------------------------|-------------------------------------|------------------------|----|-----|--------|-----|--------|--------|-----|------|------|
|                     | 600.2144                          | 600.2140                            | 0.054                  | T  | 1   | 1      | 1   | 0      | 0      | 0   | 0    | 0    |
|                     | 1122.3852                         | 1122.3837                           | 0.053                  | S  | 1   | 2      | 1   | 1      | 0      | 1   | 0    | 0    |
|                     | 829.2739                          | 829.2727                            | 0.051                  | T  | 1   | 1      | 0   | 1      | 0      | 2   | 0    | 0    |
|                     | 1017.3435                         | 1017.3412                           | 0.046                  | T  | 1   | 1      | 1   | 1      | 0      | 3   | 0    | 0    |
|                     | 657.2359                          | 657.2354                            | 0.044                  | T  | 1   | 2      | 0   | 0      | 0      | 0   | 0    | 0    |
|                     | 933.3217                          | 933.3200                            | 0.041                  | T  | 1   | 1      | 1   | 1      | 0      | 1   | 0    | 0    |
|                     | 1206.4056                         | 1206.4049                           | 0.039                  | S  | 1   | 2      | 1   | 1      | 0      | 3   | 0    | 0    |
|                     | 1060.3482                         | 1060.3470                           | 0.038                  | S  | 1   | 2      | 0   | 1      | 0      | 3   | 0    | 0    |
|                     | 731.2363                          | 731.2358                            | 0.037                  | S  | 1   | 1      | 0   | 1      | 0      | 0   | 0    | 0    |
|                     | 1138.3802                         | 1138.3786                           | 0.036                  | S  | 1   | 2      | 1   | 0      | 1      | 1   | 0    | 0    |
|                     | 1153.393                          | 1153.3895                           | 0.036                  | S  | 1   | 3      | 0   | 0      | 1      | 0   | 0    | 0    |
|                     | 934.316                           | 934.3152                            | 0.034                  | S  | 1   | 2      | 0   | 1      | 0      | 0   | 0    | 0    |
|                     | 1110.3849                         | 1110.3837                           | 0.032                  | T  | 2   | 2      | 0   | 1      | 0      | 0   | 0    | 0    |
|                     | 1168.4214                         | 1168.4255                           | 0.031                  | T  | 2   | 3      | 1   | 0      | 0      | 0   | 0    | 0    |
|                     | 1111.4054                         | 1111.4041                           | 0.029                  | T  | 2   | 2      | 2   | 0      | 0      | 0   | 0    | 0    |

O-glycan structures identified in BSM after oxidative release and analysis at pH 6.5.

| Suggested structure                                                                 | Observed $m/z$ [M-H] <sup>-</sup> | Calculated $m/z$ [M-H] <sup>-</sup> | Relative abundance (%) | AA | Hex | HexNAc | Fuc | Neu5Ac | Neu5Ge | OAc | HexA | Sulf |
|-------------------------------------------------------------------------------------|-----------------------------------|-------------------------------------|------------------------|----|-----|--------|-----|--------|--------|-----|------|------|
| 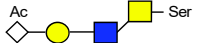   | 992.3218                          | 992.3207                            | 0.029                  | S  | 1   | 2      | 0   | 0      | 1      | 1   | 0    | 0    |
|    | 919.3063                          | 919.3043                            | 0.027                  | S  | 1   | 1      | 1   | 1      | 0      | 1   | 0    | 0    |
|    | 1096.3694                         | 1096.3680                           | 0.027                  | S  | 2   | 2      | 0   | 1      | 0      | 0   | 0    | 0    |
|    | 1074.3639                         | 1074.3626                           | 0.027                  | T  | 1   | 2      | 0   | 1      | 0      | 3   | 0    | 0    |
|    | 815.2582                          | 815.2570                            | 0.027                  | S  | 1   | 1      | 0   | 1      | 0      | 2   | 0    | 0    |
|   | 894.312                           | 894.3090                            | 0.025                  | S  | 2   | 1      | 2   | 0      | 0      | 0   | 0    | 0    |
|  | 950.3121                          | 950.3101                            | 0.025                  | S  | 1   | 2      | 0   | 0      | 1      | 0   | 0    | 0    |
|  | 1367.475                          | 1367.4737                           | 0.024                  | S  | 1   | 3      | 1   | 1      | 0      | 2   | 0    | 0    |
|  | 1643.5718                         | 1643.5694                           | 0.024                  | S  | 1   | 5      | 0   | 0      | 1      | 2   | 0    | 0    |
|  | 1152.3955                         | 1152.3942                           | 0.023                  | T  | 1   | 2      | 1   | 0      | 1      | 1   | 0    | 0    |
|  | 964.3268                          | 964.3257                            | 0.023                  | T  | 1   | 2      | 0   | 0      | 1      | 0   | 0    | 0    |
|  | 1220.4209                         | 1220.4206                           | 0.024                  | T  | 1   | 2      | 1   | 1      | 0      | 3   | 0    | 0    |
|  | 1136.4007                         | 1136.3994                           | 0.023                  | T  | 1   | 2      | 1   | 1      | 0      | 1   | 0    | 0    |
|  | 990.3423                          | 990.3414                            | 0.022                  | T  | 1   | 2      | 0   | 1      | 0      | 1   | 0    | 0    |
|  | 440.1406                          | 440.1404                            | 0.020                  | S  | 1   | 1      | 0   | 0      | 0      | 0   | 0    | 0    |

O-glycan structures identified in BSM after oxidative release and analysis at pH 6.5.

| Suggested structure                                                                 | Observed $m/z$ [M-H] <sup>-</sup> | Calculated $m/z$ [M-H] <sup>-</sup> | Relative abundance (%) | AA | Hex | HexNAc | Fuc | Neu5Ac | Neu5Ge | OAc | HexA | Sulf |
|-------------------------------------------------------------------------------------|-----------------------------------|-------------------------------------|------------------------|----|-----|--------|-----|--------|--------|-----|------|------|
| 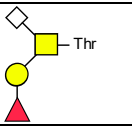   | 907.3058                          | 907.3043                            | 0.020                  | T  | 1   | 1      | 1   | 0      | 1      | 0   | 0    | 0    |
|    | 789.2433                          | 789.2413                            | 0.019                  | S  | 1   | 1      | 0   | 0      | 1      | 1   | 0    | 0    |
|    | 1006.3378                         | 1006.3363                           | 0.019                  | T  | 1   | 2      | 0   | 0      | 1      | 1   | 0    | 0    |
|    | 1003.3272                         | 1003.3255                           | 0.019                  | S  | 1   | 1      | 1   | 1      | 0      | 3   | 0    | 0    |
|    | 747.2309                          | 747.2307                            | 0.019                  | S  | 1   | 1      | 0   | 0      | 1      | 0   | 0    | 0    |
|   | 1080.3735                         | 1080.3731                           | 0.019                  | S  | 1   | 2      | 1   | 1      | 0      | 0   | 0    | 0    |
|  | 908.3265                          | 908.3247                            | 0.018                  | T  | 2   | 1      | 2   | 0      | 0      | 0   | 0    | 0    |
|  | 1209.4533                         | 1209.4521                           | 0.018                  | T  | 1   | 4      | 1   | 0      | 0      | 0   | 0    | 0    |
|  | 949.3164                          | 949.3149                            | 0.017                  | T  | 1   | 1      | 1   | 0      | 1      | 1   | 0    | 0    |
|  | 1424.4936                         | 1424.4951                           | 0.016                  | S  | 1   | 4      | 0   | 1      | 0      | 2   | 0    | 0    |
|  | 860.3152                          | 860.3148                            | 0.016                  | T  | 1   | 3      | 0   | 0      | 0      | 0   | 0    | 0    |
|  | 891.3102                          | 891.3094                            | 0.016                  | T  | 1   | 1      | 1   | 1      | 0      | 0   | 0    | 0    |
|  | 901.3424                          | 901.3413                            | 0.016                  | T  | 0   | 4      | 0   | 0      | 0      | 0   | 0    | 0    |
|  | 1194.4035                         | 1194.4048                           | 0.015                  | T  | 1   | 2      | 1   | 0      | 1      | 2   | 0    | 0    |

O-glycan structures identified in BSM after oxidative release and analysis at pH 6.5.

| Suggested structure | Observed $m/z$ [M-H] <sup>-</sup> | Calculated $m/z$ [M-H] <sup>-</sup> | Relative abundance (%) | AA | Hex | HexNAc | Fuc | Neu5Ac | Neu5Ge | OAc | HexA | Sulf |
|---------------------|-----------------------------------|-------------------------------------|------------------------|----|-----|--------|-----|--------|--------|-----|------|------|
|                     | 893.29                            | 893.2886                            | 0.015                  | S  | 1   | 1      | 1   | 0      | 1      | 0   | 0    | 0    |
|                     | 1154.411                          | 1154.4099                           | 0.015                  | S  | 2   | 3      | 1   | 0      | 0      | 0   | 0    | 0    |
|                     | 1076.3427                         | 1076.3419                           | 0.015                  | S  | 1   | 2      | 0   | 0      | 1      | 3   | 0    | 0    |
|                     | 1310.4546                         | 1310.4522                           | 0.014                  | S  | 1   | 2      | 2   | 1      | 0      | 2   | 0    | 0    |
|                     | 1094.3536                         | 1094.3524                           | 0.014                  | T  | 1   | 1      | 0   | 1      | 1      | 1   | 0    | 0    |
|                     | 887.2808                          | 887.2782                            | 0.012                  | T  | 1   | 1      | 0   | 0      | 1      | 3   | 0    | 0    |
|                     | 1381.4892                         | 1381.4893                           | 0.012                  | T  | 1   | 3      | 1   | 1      | 0      | 2   | 0    | 0    |
|                     | 1094.3883                         | 1094.3888                           | 0.012                  | T  | 1   | 2      | 1   | 1      | 0      | 0   | 0    | 0    |
|                     | 991.3266                          | 991.3255                            | 0.011                  | T  | 1   | 1      | 1   | 0      | 1      | 2   | 0    | 0    |
|                     | 877.2949                          | 877.2937                            | 0.011                  | S  | 1   | 1      | 1   | 1      | 0      | 0   | 0    | 0    |
|                     | 1048.3489                         | 1048.3469                           | 0.011                  | T  | 1   | 2      | 0   | 0      | 1      | 2   | 0    | 0    |
|                     | 1412.4957                         | 1412.4951                           | 0.011                  | T  | 1   | 4      | 0   | 0      | 1      | 1   | 0    | 0    |
|                     | 948.332                           | 948.3308                            | 0.011                  | T  | 1   | 2      | 0   | 1      | 0      | 0   | 0    | 0    |
|                     | 873.2608                          | 873.2625                            | 0.010                  | S  | 1   | 1      | 0   | 0      | 1      | 3   | 0    | 0    |
|                     | 965.3472                          | 965.3462                            | 0.010                  | T  | 2   | 2      | 1   | 0      | 0      | 0   | 0    | 0    |

O-glycan structures identified in BSM after oxidative release and analysis at pH 6.5.

| Suggested structure | Observed $m/z$ [M-H] <sup>-</sup> | Calculated $m/z$ [M-H] <sup>-</sup> | Relative abundance (%) | AA | Hex | HexNAc | Fuc | Neu5Ac | Neu5Ge | OAc | HexA | Sulf |
|---------------------|-----------------------------------|-------------------------------------|------------------------|----|-----|--------|-----|--------|--------|-----|------|------|
|                     | 887.3264                          | 887.3257                            | 0.0099                 | S  | 0   | 4      | 0   | 0      | 0      | 0   | 0    | 0    |
| Ac (                | 1398.4803                         | 1398.4794                           | 0.0097                 | S  | 1   | 4      | 0   | 0      | 1      | 1   | 0    | 0    |
| ⊕ (                 | 869.2373                          | 869.2345                            | 0.0095                 | S  | 1   | 2      | 1   | 0      | 0      | 0   | 0    | 1    |
| triAc (             | 1090.3589                         | 1090.3575                           | 0.0095                 | T  | 1   | 2      | 0   | 0      | 1      | 3   | 0    | 0    |
| 2x (                | 1291.9372 [M-2H] <sup>2-</sup>    | 2584.8917                           | 0.0092                 | T  | 4   | 4      | 1   | 2      | 1      | 0   | 0    | 0    |
| diAc (              | 1324.4697                         | 1324.4679                           | 0.0088                 | T  | 1   | 2      | 2   | 1      | 0      | 2   | 0    | 0    |
| Ac (                | 935.3001                          | 935.2992                            | 0.0086                 | S  | 1   | 1      | 1   | 0      | 1      | 1   | 0    | 0    |
| ⊕ (                 | 764.2051                          | 764.2031                            | 0.0086                 | S  | 0   | 3      | 0   | 0      | 0      | 0   | 0    | 1    |
|                     | 1049.3795                         | 1049.3785                           | 0.0084                 | S  | 1   | 4      | 0   | 0      | 0      | 0   | 0    | 0    |
|                     | 819.2885                          | 819.2883                            | 0.0083                 | T  | 2   | 2      | 0   | 0      | 0      | 0   | 0    | 0    |
| triAc (             | 704.2403 [M-2H] <sup>2-</sup>     | 704.2385 [M-2H] <sup>2-</sup>       | 0.0082                 | S  | 1   | 3      | 1   | 1      | 0      | 3   | 0    | 0    |
| ⊕ (                 | 883.251                           | 883.2501                            | 0.0079                 | T  | 1   | 2      | 1   | 0      | 0      | 0   | 0    | 1    |
| ⊕ (                 | 737.1926                          | 737.1922                            | 0.0076                 | T  | 1   | 2      | 0   | 0      | 0      | 0   | 0    | 1    |
| ⊕ (                 | 696.1263                          | 696.1293                            | 0.0066                 | S  | 1   | 1      | 0   | 0      | 0      | 0   | 1    | 1    |
|                     | 1063.3954                         | 1063.3942                           | 0.0063                 | T  | 1   | 4      | 0   | 0      | 0      | 0   | 0    | 0    |
| diAc (              | 1657.5857                         | 1657.5850                           | 0.0058                 | T  | 1   | 5      | 0   | 0      | 1      | 2   | 0    | 0    |
| 2x (                | 1314.4854                         | 1314.4834                           | 0.0057                 | T  | 2   | 3      | 2   | 0      | 0      | 0   | 0    | 0    |

O-glycan structures identified in BSM after oxidative release and analysis at pH 6.5.

| Suggested structure                                                                    | Observed $m/z$ [M-H] <sup>-</sup> | Calculated $m/z$ [M-H] <sup>-</sup> | Relative abundance (%) | AA | Hex | HexNAc | Fuc | Neu5Ac | Neu5Ge | OAc | HexA | Sulf |
|----------------------------------------------------------------------------------------|-----------------------------------|-------------------------------------|------------------------|----|-----|--------|-----|--------|--------|-----|------|------|
| 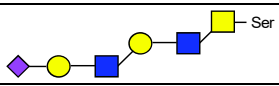      | 649.22<br>[M-2H] <sup>2-</sup>    | 649.2201<br>[M-2H] <sup>2-</sup>    | 0.0056                 | S  | 2   | 3      | 0   | 1      | 0      | 0   | 0    | 0    |
| $\text{eS} \left( \begin{array}{c} \text{Thr} \\ \text{HexNAc} \end{array} \right)$    | 778.2194                          | 778.2188                            | 0.0052                 | T  | 0   | 3      | 0   | 0      | 0      | 0   | 0    | 1    |
| $\text{diAc} \left( \begin{array}{c} \text{Thr} \\ \text{HexNAc} \end{array} \right)$  | 718.7516<br>[M-2H] <sup>2-</sup>  | 718.7518<br>[M-2H] <sup>2-</sup>    | 0.0052                 | T  | 1   | 4      | 0   | 1      | 0      | 2   | 0    | 0    |
|       | 1180.391                          | 1180.3892                           | 0.0050                 | S  | 1   | 2      | 1   | 0      | 1      | 2   | 0    | 0    |
| $\text{triAc} \left( \begin{array}{c} \text{Thr} \\ \text{HexNAc} \end{array} \right)$ | 711.2465<br>[M-2H] <sup>2-</sup>  | 711.2463<br>[M-2H] <sup>2-</sup>    | 0.0043                 | T  | 1   | 3      | 1   | 1      | 0      | 3   | 0    | 0    |
| $\text{eS} \left( \begin{array}{c} \text{Thr} \\ \text{HexNAc} \end{array} \right)$    | 1045.3048                         | 1045.3030                           | 0.0042                 | T  | 2   | 2      | 1   | 0      | 0      | 0   | 0    | 1    |
|       | 670.2241<br>[M-2H] <sup>2-</sup>  | 670.2254<br>[M-2H] <sup>2-</sup>    | 0.0039                 | S  | 2   | 3      | 0   | 1      | 0      | 1   | 0    | 0    |
| $2x \left( \begin{array}{c} \text{Thr} \\ \text{HexNAc} \end{array} \right)$           | 1284.9305<br>[M-2H] <sup>2-</sup> | 1284.934<br>[M-2H] <sup>2-</sup>    | 0.0039                 | S  | 4   | 4      | 1   | 2      | 1      | 0   | 0    | 0    |
| $\text{eS} \left( \begin{array}{c} \text{Thr} \end{array} \right)$                     | 372.0602                          | 372.0600                            | 0.0034                 | T  | 0   | 1      | 0   | 0      | 0      | 0   | 0    | 1    |
| $\text{Ac} \left( \begin{array}{c} \text{Ser} \\ \text{HexNAc} \end{array} \right)$    | 1080.3393                         | 1080.3367                           | 0.0034                 | S  | 1   | 1      | 0   | 1      | 1      | 1   | 0    | 0    |
|     | 977.3106                          | 977.3098                            | 0.0031                 | S  | 1   | 1      | 1   | 0      | 1      | 2   | 0    | 0    |
|     | 1313.4643                         | 1313.4630                           | 0.0029                 | T  | 2   | 3      | 0   | 1      | 0      | 0   | 0    | 0    |
|     | 454.1563                          | 454.1561                            | 0.0028                 | T  | 1   | 1      | 0   | 0      | 0      | 0   | 0    | 0    |
| $\text{Ac} \left( \begin{array}{c} \text{Thr} \\ \text{HexNAc} \end{array} \right)$    | 677.2337<br>[M-2H] <sup>2-</sup>  | 677.2332<br>[M-2H] <sup>2-</sup>    | 0.0021                 | T  | 2   | 3      | 0   | 1      | 0      | 1   | 0    | 0    |
| $\text{eS} \left( \begin{array}{c} \text{Ser} \end{array} \right)$                     | 358.0443                          | 358.0444                            | 0.0019                 | S  | 0   | 1      | 0   | 0      | 0      | 0   | 0    | 1    |
| $\text{eS} \left( \begin{array}{c} \text{Thr} \end{array} \right)$                     | 534.1141                          | 534.1129                            | 0.0013                 | T  | 1   | 1      | 0   | 0      | 0      | 0   | 0    | 1    |
| $\text{Ac} \left( \begin{array}{c} \text{Ser} \end{array} \right)$                     | 773.2485                          | 773.2464                            | 0.00093                | S  | 1   | 1      | 0   | 1      | 0      | 1   | 0    | 0    |



**Table III:** Compositions of *O*-glycans released from BSM with reductive beta elimination and analyzed with LC-MS with an eluent pH of 6.5. Hex=hexose, Fuc=fucose, Neu5Ac= *N*-Acetylneuraminic acid, Neu5Gc= *N*-Glycolylneuraminic acid, HexA=hexosamine, Sulf=sulfate.

*O*-glycan structures identified in BSM after beta elimination and analysis at pH 6.5.

| Suggested structure                                                                 | Observed $m/z$ [M-H] <sup>-</sup> | Calculated $m/z$ [M-H] <sup>-</sup> | Retention time (min) | Relative abundance (%) | Hex | HexNAc | Fuc | Neu5Ac | Neu5Gc | Sulf |
|-------------------------------------------------------------------------------------|-----------------------------------|-------------------------------------|----------------------|------------------------|-----|--------|-----|--------|--------|------|
| 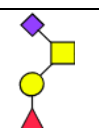   | 821.3057                          | 821.3045                            | 14.1                 | 26.2                   | 1   | 1      | 1   | 1      | 0      | 0    |
|    | 975.2992                          | 975.2981                            | 14.5                 | 18.8                   | 2   | 2      | 1   | 0      | 0      | 1    |
|                                                                                     | 975.2980                          |                                     | 15.4                 | 0.22                   |     |        |     |        |        |      |
|                                                                                     | 975.2975                          |                                     | 15.7                 | 0.12                   |     |        |     |        |        |      |
|    | 733.2895                          | 733.2884                            | 19.0                 | 9.95                   | 1   | 2      | 1   | 0      | 0      | 0    |
|                                                                                     | 733.2880                          |                                     | 17.3                 | 0.14                   |     |        |     |        |        |      |
|                                                                                     | 733.2884                          |                                     | 20.2                 | 0.06                   |     |        |     |        |        |      |
|    | 530.2093                          | 530.2090                            | 15.9                 | 7.39                   | 1   | 1      | 1   | 0      | 0      | 0    |
|                                                                                     | 530.2084                          |                                     | 17.6                 | 0.07                   |     |        |     |        |        |      |
|   | 837.3007                          | 837.2994                            | 15.3                 | 6.98                   | 1   | 1      | 1   | 0      | 1      | 0    |
|  | 813.2461                          | 813.2452                            | 13.6                 | 6.61                   | 1   | 2      | 1   | 0      | 0      | 1    |
|  | 513.1938                          | 513.1937                            | 10.2                 | 5.02                   | 0   | 1      | 0   | 1      | 0      | 0    |
|  | 716.2741                          | 716.2731                            | 13.0                 | 2.30                   | 0   | 2      | 0   | 1      | 0      | 0    |
|                                                                                     | 716.2740                          |                                     | 13.6                 | 1.50                   |     |        |     |        |        |      |
|  | 1121.3572                         | 1121.3560                           | 16.0                 | 2.47                   | 2   | 2      | 2   | 0      | 0      | 1    |
|                                                                                     | 1121.3550                         |                                     | 16.5                 | 0.18                   |     |        |     |        |        |      |
|                                                                                     | 1121.3553                         |                                     | 16.9                 | 0.07                   |     |        |     |        |        |      |
|  | 1041.4005                         | 1041.3992                           | 21.2                 | 1.94                   | 2   | 2      | 2   | 0      | 0      | 0    |
|                                                                                     | 1041.3990                         |                                     | 21.7                 | 0.23                   |     |        |     |        |        |      |
|  | 895.3428                          | 895.3412                            | 20.6                 | 1.80                   | 2   | 2      | 1   | 0      | 0      | 0    |
|  | 1178.3777                         | 1178.3774                           | 16.7                 | 1.11                   | 2   | 3      | 1   | 0      | 0      | 1    |
|                                                                                     | 1178.3767                         |                                     | 16.4                 | 0.46                   |     |        |     |        |        |      |
|                                                                                     | 1178.3759                         |                                     | 17.4                 | 0.06                   |     |        |     |        |        |      |
|  | 1016.3256                         | 1016.3246                           | 14.3                 | 1.13                   | 1   | 3      | 1   | 0      | 0      | 1    |
|  | 732.2686                          | 732.2680                            | 14.3                 | 0.35                   | 0   | 2      | 0   | 0      | 1      | 0    |
|                                                                                     | 732.2679                          |                                     | 14.8                 | 0.27                   |     |        |     |        |        |      |



O-glycan structures identified in BSM after beta elimination and analysis at pH 6.5.

| Suggested structure | Observed $m/z$ [M-H] <sup>-</sup>       | Calculated $m/z$ [M-H] <sup>-</sup>     | Retention time (min) | Relative abundance (%) | Hex | HexNAc | Fuc | Neu5Ac | Neu5Gc | Sulf |
|---------------------|-----------------------------------------|-----------------------------------------|----------------------|------------------------|-----|--------|-----|--------|--------|------|
|                     | 529.1889                                | 529.1886                                | 12.2                 | 0.53                   | 0   | 1      | 0   | 0      | 1      | 0    |
|                     | 936.3683                                | 936.3678                                | 21.1                 | 0.38                   | 1   | 3      | 1   | 0      | 0      | 0    |
|                     | 936.3676                                |                                         | 20.7                 | 0.07                   |     |        |     |        |        |      |
|                     | 936.3676                                |                                         | 20.3                 | 0.03                   |     |        |     |        |        |      |
|                     | 1187.4573                               | 1187.4571                               | 22.3                 | 0.47                   | 2   | 2      | 3   | 0      | 0      | 0    |
|                     | 1244.4780                               | 1244.4785                               | 21.9                 | 0.42                   | 2   | 3      | 2   | 0      | 0      | 0    |
|                     | 870.2669                                | 870.2667                                | 14.2                 | 0.37                   | 1   | 3      | 0   | 0      | 0      | 1    |
|                     | 1186.4358                               | 1186.4367                               | 16.7                 | 0.21                   | 2   | 2      | 1   | 1      | 0      | 0    |
|                     | 1040.3782                               | 1040.3788                               | 17.1                 | 0.16                   | 2   | 2      | 0   | 1      | 0      | 0    |
|                     | 878.3257                                | 878.3259                                | 15.7                 | 0.12                   | 1   | 2      | 0   | 1      | 0      | 0    |
|                     | 1324.4335                               | 1324.4353                               | 17.5                 | 0.08                   | 2   | 3      | 2   | 0      | 0      | 1    |
|                     | 1032.3193                               | 1032.3195                               | 16.2                 | 0.06                   | 2   | 3      | 0   | 0      | 0      | 1    |
|                     | 1032.3186                               |                                         | 15.5                 | 0.02                   |     |        |     |        |        |      |
|                     | 1014.3072<br>(as [M-2H] <sup>2-</sup> ) | 1014.3090<br>(as [M-2H] <sup>2-</sup> ) | 17.4                 | 0.07                   | 3   | 6      | 1   | 0      | 0      | 2    |
|                     | 1139.4461                               | 1139.4472                               | 22.7                 | 0.07                   | 1   | 4      | 1   | 0      | 0      | 0    |
|                     | 1202.4309                               | 1202.4316                               | 17.5                 | 0.06                   | 2   | 2      | 1   | 0      | 1      | 0    |
|                     | 1170.4412                               | 1170.4417                               | 17.5                 | 0.05                   | 1   | 2      | 2   | 1      | 0      | 0    |
|                     | 1073.3453                               | 1073.3461                               | 16.6                 | 0.05                   | 1   | 4      | 0   | 0      | 0      | 1    |
|                     | 1057.3933                               | 1057.3941                               | 22.1                 | 0.05                   | 3   | 2      | 1   | 0      | 0      | 0    |
|                     | 610.1654                                | 610.1659                                | 10.5                 | 0.05                   | 1   | 1      | 1   | 0      | 0      | 1    |
|                     | 676.2665                                | 676.2670                                | 19.6                 | 0.04                   | 1   | 1      | 2   | 0      | 0      | 0    |

O-glycan structures identified in BSM after beta elimination and analysis at pH 6.5.

| Suggested structure                                                                | Observed $m/z$<br>[M-H] <sup>-</sup>    | Calculated $m/z$<br>[M-H] <sup>-</sup>  | Retention<br>time<br>(min) | Relative<br>abundance (%) | Hex | HexNAc | Fuc | Neu5Ac | Neu5Gc | Sulf |
|------------------------------------------------------------------------------------|-----------------------------------------|-----------------------------------------|----------------------------|---------------------------|-----|--------|-----|--------|--------|------|
| 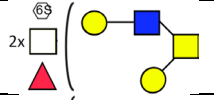  | 690.2249<br>(as [M-2H] <sup>2-</sup> )  | 690.2248<br>(as [M-2H] <sup>2-</sup> )  | 18.2                       | 0.04                      | 2   | 4      | 1   | 0      | 0      | 1    |
|   | 1082.4248                               | 1082.4257                               | 22.3                       | 0.04                      | 1   | 3      | 2   | 0      | 0      | 0    |
|   | 675.2458                                | 675.2466                                | 14.0                       | 0.03                      | 1   | 1      | 0   | 1      | 0      | 0    |
|   | 1063.3324<br>[M-2H] <sup>2-</sup>       | 1063.3330<br>(as [M-2H] <sup>2-</sup> ) | 20.1                       | 0.03                      | 2   | 8      | 0   | 0      | 0      | 2    |
|   | 669.7114<br>(as [M-2H] <sup>2-</sup> )  | 669.7115<br>(as [M-2H] <sup>2-</sup> )  | 17.6                       | 0.03                      | 3   | 3      | 1   | 0      | 0      | 1    |
|   | 879.3459                                | 879.3463                                | 19.3                       | 0.03                      | 1   | 2      | 2   | 0      | 0      | 0    |
|   | 1013.8167<br>(as [M-2H] <sup>2-</sup> ) | 1013.8202<br>(as [M-2H] <sup>2-</sup> ) | 20.9                       | 0.02                      | 5   | 4      | 0   | 0      | 1      | 1    |
|  | 843.7713<br>(as [M-2H] <sup>2-</sup> )  | 843.7699<br>(as [M-2H] <sup>2-</sup> )  | 16.6                       | 0.02                      | 3   | 4      | 0   | 1      | 0      | 1    |

**Table IV:** Compositions of *O*-glycans released from BSM with reductive beta elimination and analyzed with LC-MS with an eluent pH of 7.8. Hex=hexose, Fuc=fucose, Neu5Ac= *N*-Acetylneuraminic acid, Neu5Gc= *N*-Glycolylneuraminic acid, HexA=hexosamine, Sulf=sulfate.

*O*-glycan structures identified in BSM after beta elimination and analysis at pH 7.8.

| Composition                                                                         | Observed m/z [M-H] <sup>-</sup> | Calculated m/z [M-H] <sup>-</sup> | Retention time (min) | Relative abundance (%) | Hex | HexNAc | Fuc | Neu5Ac | Neu5Gc | Sulf |
|-------------------------------------------------------------------------------------|---------------------------------|-----------------------------------|----------------------|------------------------|-----|--------|-----|--------|--------|------|
| 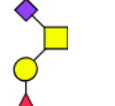   | 821.3041                        | 821.3045                          | 17.5                 | 43.4                   | 1   | 1      | 1   | 1      | 0      | 0    |
|    | 975.2982                        | 975.2981                          | 17.8                 | 10.7                   | 2   | 2      | 1   | 0      | 0      | 1    |
|                                                                                     | 975.2972                        |                                   | 18.5                 | 0.12                   |     |        |     |        |        |      |
|    | 530.2082                        | 530.2090                          | 15.7                 | 10.8                   | 1   | 1      | 1   | 0      | 0      | 0    |
|                                                                                     | 530.2102                        |                                   | 14.4                 | 0.06                   |     |        |     |        |        |      |
|    | 733.2874                        | 733.2884                          | 18.8                 | 9.10                   | 1   | 2      | 1   | 0      | 0      | 0    |
|                                                                                     | 733.2858                        |                                   | 17.1                 | 0.04                   |     |        |     |        |        |      |
|                                                                                     | 733.2865                        |                                   | 20.0                 | 0.03                   |     |        |     |        |        |      |
|   | 813.2447                        | 813.2452                          | 17.4                 | 4.79                   | 1   | 2      | 1   | 0      | 0      | 1    |
|  | 837.2990                        | 837.2994                          | 18.2                 | 3.89                   | 1   | 1      | 1   | 0      | 1      | 0    |
|  | 1041.3995                       | 1041.3992                         | 21.0                 | 3.39                   | 2   | 2      | 2   | 0      | 0      | 0    |
|                                                                                     | 1041.3983                       |                                   | 21.4                 | 0.27                   |     |        |     |        |        |      |
|  | 513.1927                        | 513.1937                          | 15.9                 | 3.21                   | 0   | 1      | 0   | 1      | 0      | 0    |
|  | 895.3405                        | 895.3412                          | 20.4                 | 2.08                   | 2   | 2      | 1   | 0      | 0      | 0    |
|  | 716.2722                        | 716.2731                          | 17.3                 | 0.94                   | 0   | 2      | 0   | 1      | 0      | 0    |
|                                                                                     | 716.2717                        |                                   | 17.0                 | 0.86                   |     |        |     |        |        |      |
|  | 1121.3557                       | 1121.3560                         | 18.7                 | 0.93                   | 2   | 2      | 2   | 0      | 0      | 1    |
|                                                                                     | 1121.3558                       |                                   | 19.0                 | 0.13                   |     |        |     |        |        |      |
|  | 1016.3242                       | 1016.3246                         | 17.7                 | 0.87                   | 1   | 3      | 1   | 0      | 0      | 1    |
|  | 936.3664                        | 936.3678                          | 20.9                 | 0.58                   | 1   | 3      | 1   | 0      | 0      | 0    |
|                                                                                     | 936.3658                        |                                   | 20.5                 | 0.07                   |     |        |     |        |        |      |
|  | 1244.4779                       | 1244.4785                         | 21.7                 | 0.54                   | 2   | 3      | 2   | 0      | 0      | 0    |
|  | 1187.4576                       | 1187.4571                         | 22.1                 | 0.40                   | 2   | 2      | 3   | 0      | 0      | 0    |

O-glycan structures identified in BSM after beta elimination and analysis at pH 7.8.

| Composition | Observed m/z [M-H] <sup>-</sup> | Calculated m/z [M-H] <sup>-</sup> | Retention time (min) | Relative abundance (%) | Hex | HexNAc | Fuc | Neu5Ac | Neu5Gc | Sulf |
|-------------|---------------------------------|-----------------------------------|----------------------|------------------------|-----|--------|-----|--------|--------|------|
|             | 870.2661                        | 870.2667                          | 17.7                 | 0.36                   | 1   | 3      | 0   | 0      | 0      | 1    |
|             | 529.1873                        | 529.1886                          | 16.8                 | 0.35                   | 0   | 1      | 0   | 0      | 1      | 0    |
|             | 1024.3822                       | 1024.3838                         | 18.7                 | 0.34                   | 1   | 2      | 1   | 1      | 0      | 0    |
|             | 732.2665                        | 732.2680                          | 17.7                 | 0.16                   | 0   | 2      | 0   | 0      | 1      | 0    |
|             | 732.2658                        |                                   | 18.0                 | 0.14                   |     |        |     |        |        |      |
|             | 1186.4371                       | 1186.4367                         | 18.9                 | 0.23                   | 2   | 2      | 1   | 1      | 0      | 0    |
|             | 1178.3766                       | 1178.3774                         | 19.1                 | 0.21                   | 2   | 3      | 1   | 0      | 0      | 1    |
|             | 1063.3317                       | 1063.3330                         | 23.6                 | 0.19                   | 2   | 8      | 0   | 0      | 0      | 2    |
|             | 1040.3777                       | 1040.3788                         | 19.4                 | 0.18                   | 2   | 2      | 0   | 1      | 0      | 0    |
|             | 878.3248                        | 878.3259                          | 18.5                 | 0.12                   | 1   | 2      | 0   | 1      | 0      | 0    |
|             | 1202.4309                       | 1202.4316                         | 19.5                 | 0.10                   | 2   | 2      | 1   | 0      | 1      | 0    |
|             | 1170.4400                       | 1170.4417                         | 19.6                 | 0.09                   | 1   | 2      | 2   | 1      | 0      | 0    |
|             | 1139.4469                       | 1139.4472                         | 22.4                 | 0.06                   | 1   | 4      | 1   | 0      | 0      | 0    |
|             | 1057.3931                       | 1057.3941                         | 21.8                 | 0.06                   | 3   | 2      | 1   | 0      | 0      | 0    |
|             | 1082.4236                       | 1082.4257                         | 22.1                 | 0.04                   | 1   | 3      | 2   | 0      | 0      | 0    |
|             | 675.2445                        | 675.2466                          | 17.6                 | 0.04                   | 1   | 1      | 0   | 1      | 0      | 0    |
|             | 966.3404                        | 966.3420                          | 17.9                 | 0.04                   | 1   | 1      | 0   | 2      | 0      | 0    |
